# Supplementary material for: T-Cell Response against Varicella Zoster Virus in Patients with Multiple Sclerosis during Relapse and Remission
Source: MDPI journal article supplement (doi:10.3390/ijms23010298), 2021-12-28
Supplement: s1 [file s1]

**Supplementary Table S1.** Clinical, demographic and T cell proliferation data of MS patients

| Clinical data |                     |                           |                   |      |                                      |                    | Proliferation (%) |      |            |      |      |      |            |      |      |      |            |      |
|---------------|---------------------|---------------------------|-------------------|------|--------------------------------------|--------------------|-------------------|------|------------|------|------|------|------------|------|------|------|------------|------|
|               |                     |                           |                   |      |                                      |                    | CD4+              |      |            |      | CD8+ |      |            |      | Treg |      |            |      |
|               |                     |                           |                   |      |                                      |                    | VZV               |      | AV or EBV* |      | VZV  |      | AV or EBV* |      | VZV  |      | AV or EBV* |      |
| Patient       | Sex/ Age<br>(years) | Evolution time<br>(years) | Relapses/<br>year | EDSS | Current<br>Treatment                 | Days of<br>Relapse | Rel               | Rem  | Rel        | Rem  | Rel  | Rem  | Rel        | Rem  | Rel  | Rem  | Rel        | Rem  |
| 1             | F/28                | 1.5                       | 3                 | 3    | Teriflunomide                        | 2                  | 0                 | 1.4  | 0.0        | 0.3  | 0.9  | 0.3  | 0.0        | 0.0  | 50.0 | 0.0  | 12.5       | 0.0  |
| 2             | F/26                | 7                         | 2                 | 1.5  | None                                 | 2                  | 0                 | 1.6  | 0.3        | 1.2  | 4.7  | 2.3  | 0.9        | 1.0  | 25.0 | 0.0  | 25.0       | 2.7  |
| 3             | M/37                | 3                         | 1                 | 4    | IFN                                  | 2                  | 0.0               | -    | 0.0        | -    | 0.0  | -    | 0.0        | -    | 0.0  | -    | 0.0        | -    |
| 4             | F/21                | 3                         | 3                 | 6.5  | IFN                                  | 4                  | 8.4               | -    | 6.6        | -    | 16.2 | -    | 10.3       | -    | 16.7 | -    | 0.0        | -    |
| 5             | M/27                | 3                         | 2                 | 2    | IFN                                  | 7                  | 1.8               | 5.5  | 0.0        | 4.4  | 2.0  | 9.5  | 3.3        | 5.5  | 0.0  | 0.0  | 0.0        | 0.0  |
| 6             | F/42                | 5                         | 1                 | 5    | None                                 | 2                  | 6.9               | 6.4  | 4.5        | 4.3  | 1.6  | 12.1 | 0.0        | 9.3  | 0.0  | 5.4  | 0.0        | 5.6  |
| 7             | M/33                | 11                        | 2                 | 6.5  | Azathioprine                         | 7                  | 3.7               | 0.0  | 3.9        | 0.0  | 19.6 | 0.0  | 0.3        | 0.0  | 0.0  | 0.0  | 0.0        | 12.5 |
| 8             | F/34                | 4                         | 2                 | 1    | Azathioprine                         | 8                  | 7.7               | 0.0  | 0.0        | 2.5  | 5.6  | 0.0  | 0.0        | 6.2  | 5.9  | 0.0  | 0.0        | 0.0  |
| 9             | F/31                | 2                         | 0.5               | 3    | None                                 | 7                  | 3.7               | -    | 3.4        | -    | 8.6  | -    | 6.9        | -    | 0.0  | -    | 8.4        | -    |
| 10            | M/37                | 10                        | 1                 | 6.5  | Methotrexate<br>and<br>carbamazepine | 5                  | 0.0               | 3.3  | 0.0        | 2.4  | 0.0  | 6.4  | 2.2        | 5.0  | 0.0  | 5.9  | 0.0        | 0.0  |
| 11            | F/26                | 0.33                      | NA                | 1    | None                                 | 7                  | 6.9               | 6.7  | 0.0        | 2.5  | 3.9  | 8.2  | 0.7        | 7.9  | 0.0  | 0.0  | 0.0        | 0.0  |
| 12            | F/30                | 3                         | 1                 | 1.5  | IFN                                  | 8                  | 2.3               | 0.0  | 4.0        | 0.0  | 0.0  | 0.0  | 0.0        | 0.0  | 21.4 | 0.0  | 14.3       | 0.0  |
| 13            | M/31                | 2                         | 0.5               | 5.5  | Teriflunomide                        | GD                 | 0.0               | 23.3 | 0.0        | 9.9  | 0.0  | 19.7 | 0.0        | 10.1 | 0.0  | 0.0  | 0.0        | 0.0  |
| 14            | F/37                | 12                        | 1                 | 2    | None                                 | 5                  | 0.0               | 2.8  | 0.1        | 2.6  | 0.0  | 6.4  | 2.9        | 3.3  | 11.1 | 6.7  | 40.0       | 0.0  |
| 15            | F/33                | 0.08                      | NA                | 1    | None                                 | 1                  | 8.3               | -    | 4.4        | -    | 20.9 | -    | 4.2        | -    | 0.0  | -    | 0.0        | -    |
| 16            | F/22                | 4                         | 1                 | 2    | None                                 | 2                  | 2.0               | -    | 0.6        | -    | 10.6 | -    | 0.8        | -    | 13.3 | -    | 33.3       | -    |
| 17            | F/30                | 3                         | 2                 | 2    | None                                 | 8                  | 3.6               | 0.0  | 2.5        | 0.0  | 21.7 | 0.0  | 0.0        | 2.2  | 0.0  | 0.0  | 0.0        | 5.9  |
| 18            | M/20                | 1.5                       | 3                 | 4    | None                                 | 8                  | 0.4               | -    | 0.5        | -    | 0.0  | -    | 0.4        | -    | 0.0  | -    | 0.0        | -    |
| 19            | M/25                | 8                         | 2                 | 5.5  | None                                 | 8                  | 1.1               | 19.0 | 0.1        | 17.9 | 0.0  | 19.6 | 0.0        | 4.6  | 6.7  | 0.0  | 0.0        | 0.0  |
| 20            | F/26                | 0.6                       | 3                 | 3.5  | MTP                                  | 4                  | 0.0               | 1.9  | 0.2        | 1.3  | 0.0  | 1.6  | 0.7        | 0.9  | 0.0  | 7.7  | 0.0        | 3.1  |
| 21            | M/25                | 3                         | 1                 | 1    | MTP                                  | 5                  | 0.0               | -    | 0.0        | -    | 0.7  | -    | 1.0        | -    | 0.0  | -    | 0.0        | -    |
| 22            | F/31                | 16                        | 2                 | 4    | None                                 | 4                  | 0.2               | 2.6  | 0.3        | 3.2  | 0.1  | 5.7  | 1.9        | 6.8  | 0.0  | 0.0  | 0.0        | 0.0  |
| 23            | M/25                | 3                         | 0.5               | 1.5  | None                                 | 2                  | 1.1               | 1.2  | 0.0        | 1.0  | 2.5  | 1.0  | 0.7        | 0.0  | 0.0  | 0.0  | 12.5       | 0.0  |
| 24            | F/29                | 3                         | 1                 | 6    | None                                 | GD                 | 1.9               | 2.0  | 7.0        | 1.8  | 14.7 | 8.0  | 12.3       | 8.0  | 0.0  | 0.0  | 16.7       | 0.0  |
| 25            | F/39                | 14                        | 0.2               | 1    | IFN                                  | 3                  | 1.2               | 2.8  | 2.0        | 0.5  | 0.8  | 8.4  | 6.8        | 0.0  | 0.0  | 9.1  | 0.0        | 15.0 |
| 26            | M/23                | 2                         | 3                 | 3    | Natalizumab                          | 3                  | 8.0               | 3.3  | 3.2        | 1.1  | 3.0  | 6.0  | 0.0        | 2.3  | 0.0  | 11.8 | 6.3        | 33.3 |

|    |      |    |     |     |                       |   |     |     |     |     |     |     |     |     |     |      |      |     |
|----|------|----|-----|-----|-----------------------|---|-----|-----|-----|-----|-----|-----|-----|-----|-----|------|------|-----|
| 27 | F/34 | 7  | 3   | 2   | Glatiramer<br>acetate | 3 | 0.0 | 3.6 | 0.0 | 3.4 | 0.0 | 5.2 | 0.0 | 4.6 | 0.0 | 11.7 | 0.0  | 3.3 |
| 28 | F/52 | 27 | 1   | 7   | None                  | 8 | 2.3 | 0.2 | 0.4 | 0.0 | 1.7 | 0.0 | 0.8 | 0.2 | 0.0 | 0.0  | 0.0  | 0.5 |
| 29 | M/17 | 8  | 0.5 | 6.5 | Azathioprine          | 1 | 0.0 | 5.6 | 0.0 | 3.3 | 5.2 | 3.6 | 0.0 | 8.3 | 0.0 | 0.0  | 16.7 | 0.0 |

\*Cells from patients 1 to 19 were stimulated with AV, while cells from patients 20 to 29 were stimulated with EBV

NA: Not applicable

GD: new gadolinium-enhanced lesion without clinical manifestation

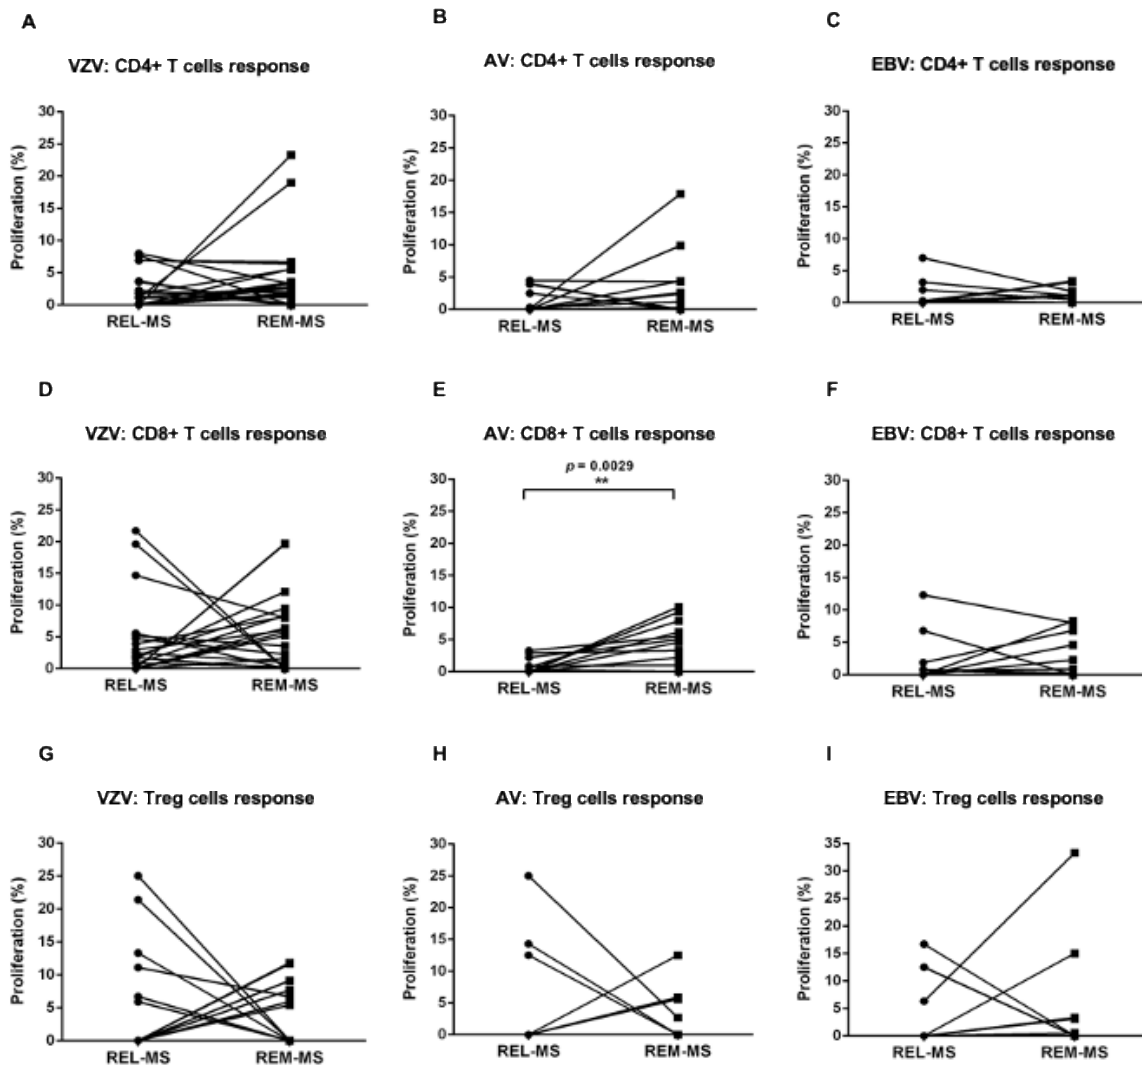

**Supplementary Figure S1. Paired Wilcoxon tests of relapse and remission cells from each subject (CD4+, CD8+ and Treg cells) to stimulation with VZV, AV or EBV.** Comparison of the T cell response to VZV (n = 22), AV (n = 13) and EBV (n = 9) between paired REL-MS and REM-MS samples show higher proliferation trends of effector CD4+ and CD8+ T lymphocytes during remission, with statistical significance only in CD8+ T cells when stimulated with AV (**A-F**). For Treg cells, there was no difference between relapse and remission status. (**G-I**). Each dot represents one subject. \*\* $p < 0.01$ .
